# Supplementary material for: Enhanced VIS-NIR emission of Re4+ doped Cs2ZrCl6 for optical thermometry and near-infrared illumination applications
Source: Royal Society of Chemistry journal article supplement (doi:10.1039/d4qi01336k), 2024-01-01
Supplement: d4qi01336k1.pdf [file d4qi01336k1.pdf]

## Supporting Information

# Enhanced VIS-NIR Emission of $\text{Re}^{4+}$ Doped $\text{Cs}_2\text{ZrCl}_6$ for Optical Thermometry and Near-Infrared Illumination Applications

Boya Li<sup>1</sup>, Zheng Huang<sup>1</sup>, Peiqing Cai<sup>1\*</sup>, Yuxin Zhan<sup>1</sup>, Xuhui Feng<sup>1</sup>, Xipeng Pu<sup>2</sup>,

Shala Bi<sup>3\*</sup>, Guanghua Wang<sup>4</sup>, Jie Zhang<sup>4</sup>, and Zugang Liu<sup>1\*</sup>

<sup>1</sup>College of Optical and Electronic Technology, China Jiliang University, Hangzhou, Zhejiang 310018, China.

<sup>2</sup>School of Materials Science and Engineering, Liaocheng University, Liaocheng, Shandong 252000, China.

<sup>3</sup>Department of Physics and Interdisciplinary Program of Biomedical, Mechanical and Electrical Engineering, Pukyong National University, Busan 608-737, Republic of Korea.

<sup>4</sup>Yunnan Olightek Opto-electronic Technology Co.,Ltd., Kunming 650223, China.

\*Author to whom correspondence should be addressed. Email: [pqcai@cjl.u.edu.cn](mailto:pqcai@cjl.u.edu.cn) (Peiqing Cai), [BI1425820017@outlook.com](mailto:BI1425820017@outlook.com) (Shala Bi) and [zgliu78@cjl.u.edu.cn](mailto:zgliu78@cjl.u.edu.cn) (Zugang Liu).

Table S1 Schemes of different molar ratios of Cs<sub>2</sub>ZrCl<sub>6</sub> to Re<sup>4+</sup> for the synthesis of Cs<sub>2</sub>ZrCl<sub>6</sub>:Re<sup>4+</sup> and the actual doping amount of Re<sup>4+</sup> measured by the ICP-OES

| Samples | Zr <sup>4+</sup> : Re <sup>4+</sup> (Molar ratio) | Actual ratio of Re <sup>4+</sup> (mol%) |
|---------|---------------------------------------------------|-----------------------------------------|
| 1       | 100:0.5                                           | 0.29                                    |
| 2       | 100:1                                             | 0.67                                    |
| 3       | 100:3                                             | 2.14                                    |
| 4       | 100:5                                             | 3.95                                    |
| 5       | 100:7                                             | 5.87                                    |

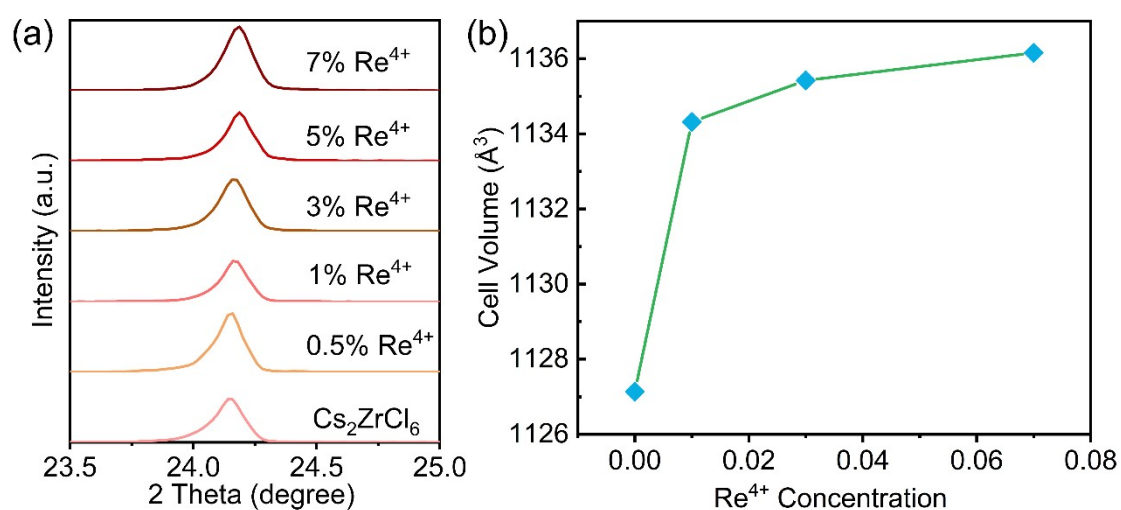

Figure S1. (a) XRD patterns in the range of  $23.5\text{--}25^\circ$  of  $\text{Cs}_2\text{ZrCl}_6$ , (b) The experimental cell volumes of  $\text{Cs}_2\text{Zr}_{1-x}\text{Cl}_6: x\text{Re}^{4+}$  as a function of  $\text{Re}^{4+}$  concentration  $x$ .

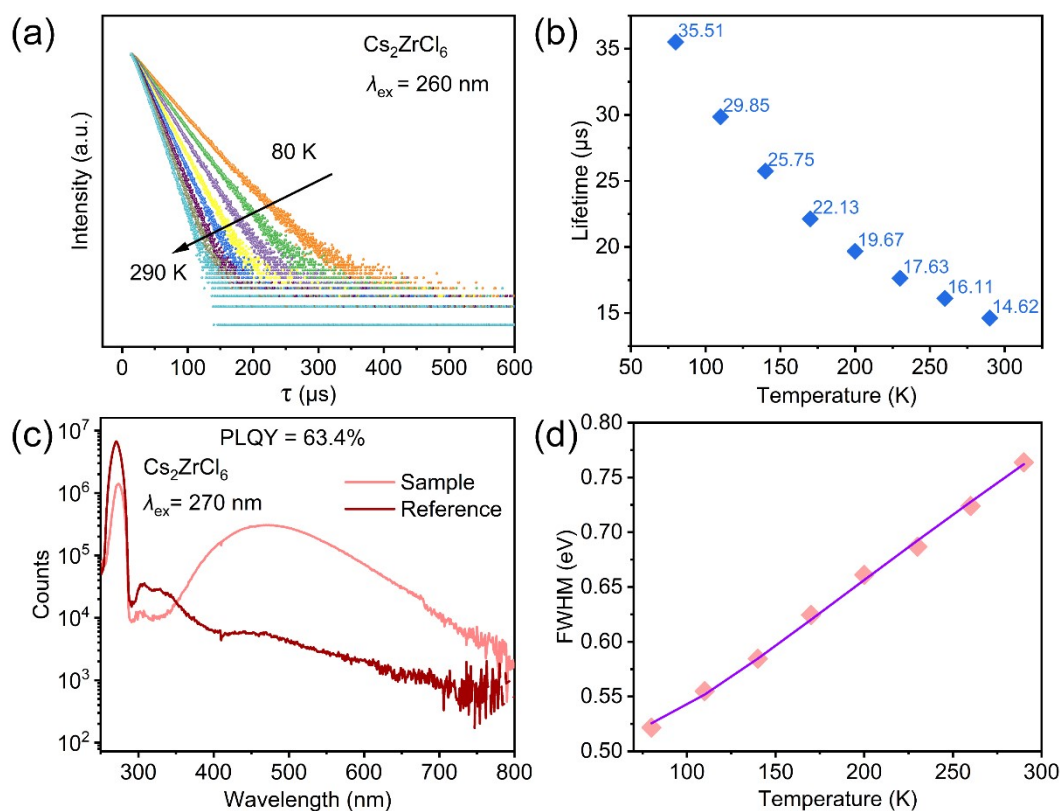

Figure S2. (a) Decay curves and (b) the calculated decay data of pure  $\text{Cs}_2\text{ZrCl}_6$  at the 80–290 K, (c) PLQY measurement of  $\text{Cs}_2\text{ZrCl}_6$  under 270 nm excitation. (d) the curve of FWHM vs. temperature and the fitting result of  $\text{Cs}_2\text{ZrCl}_6$  microcrystals.

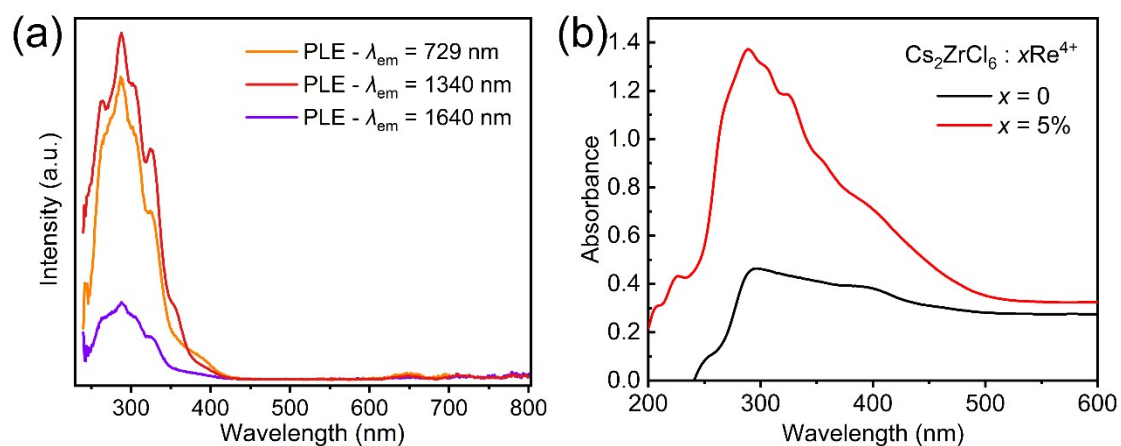

Figure S3. (a) Excitation spectra of  $\text{Cs}_2\text{ZrCl}_6: 3\%\text{Re}^{4+}$  by monitoring different PL peak emissions, (b) DSR spectra of  $\text{Cs}_2\text{ZrCl}_6: x\%\text{Re}^{4+}$  at the high-energy range.

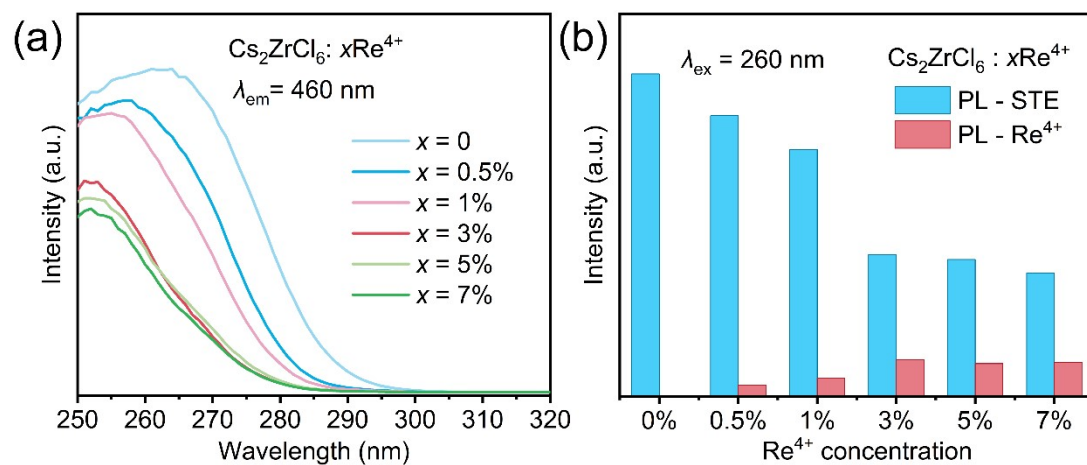

Figure S4. (a) PLE spectra of STE luminescence in  $\text{Cs}_2\text{ZrCl}_6: x\%\text{Re}^{4+}$  as a function of  $\text{Re}^{4+}$  doping concentration, (b) Comparison of  $\text{Cs}_2\text{ZrCl}_6$  PL intensity and  $\text{Re}^{4+}$  PL intensity under 260 nm excitation.

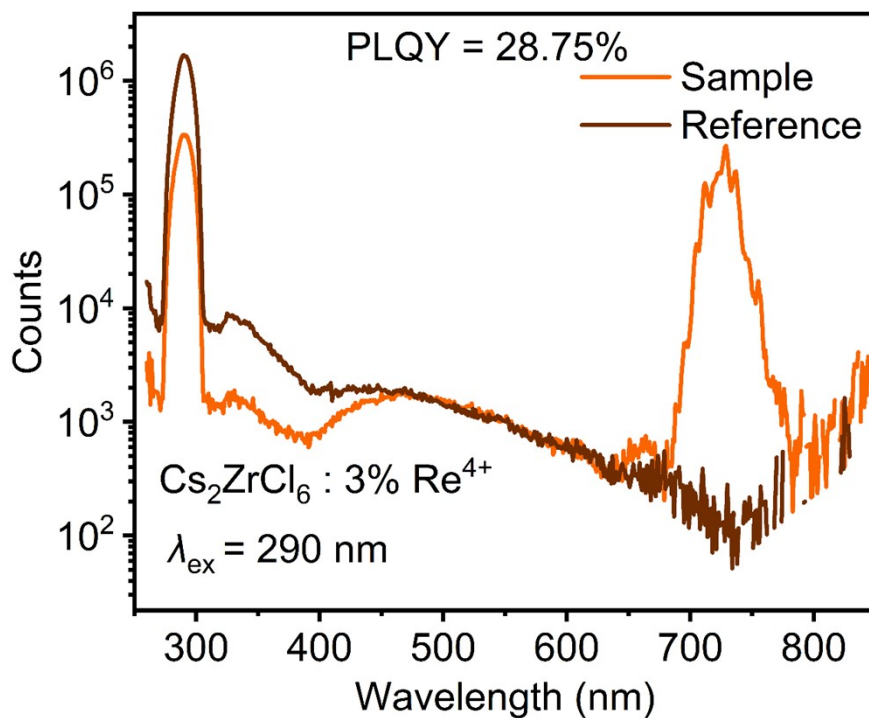

Figure S5. PLQY of the  $\text{Cs}_2\text{ZrCl}_6 : 3\% \text{Re}^{4+}$  powder under 290 nm excitation.

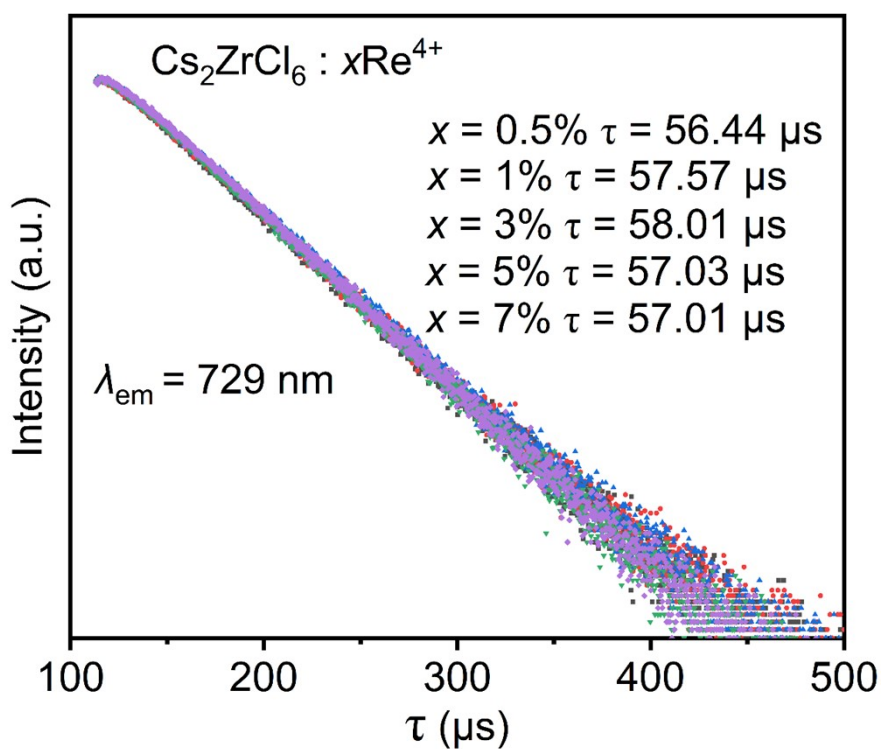

Figure S6. The concentration-dependent decay curves of  $\text{Cs}_2\text{ZrCl}_6 : x\text{Re}^{4+}$  obtained by monitoring the 729 nm emission.

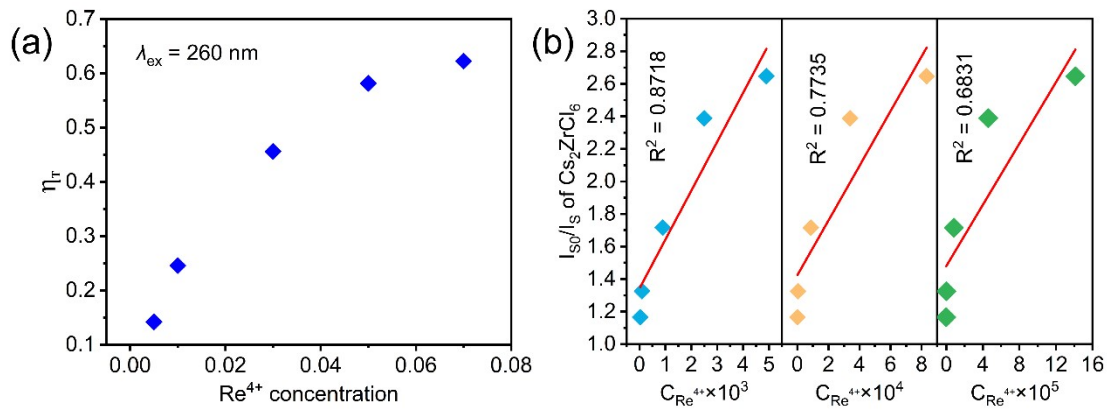

Figure S7. (a) Dependence of energy efficiency  $\eta_T$  on  $\text{Re}^{4+}$  doping concentration. (b)

Dependence of  $I_{S0}/I_S$  of  $\text{Cs}_2\text{ZrCl}_6$  on  $C_{\text{Re}^{4+}}^2$ ,  $C_{\text{Re}^{4+}}^{8/3}$  and  $C_{\text{Re}^{4+}}^{10/3}$ .

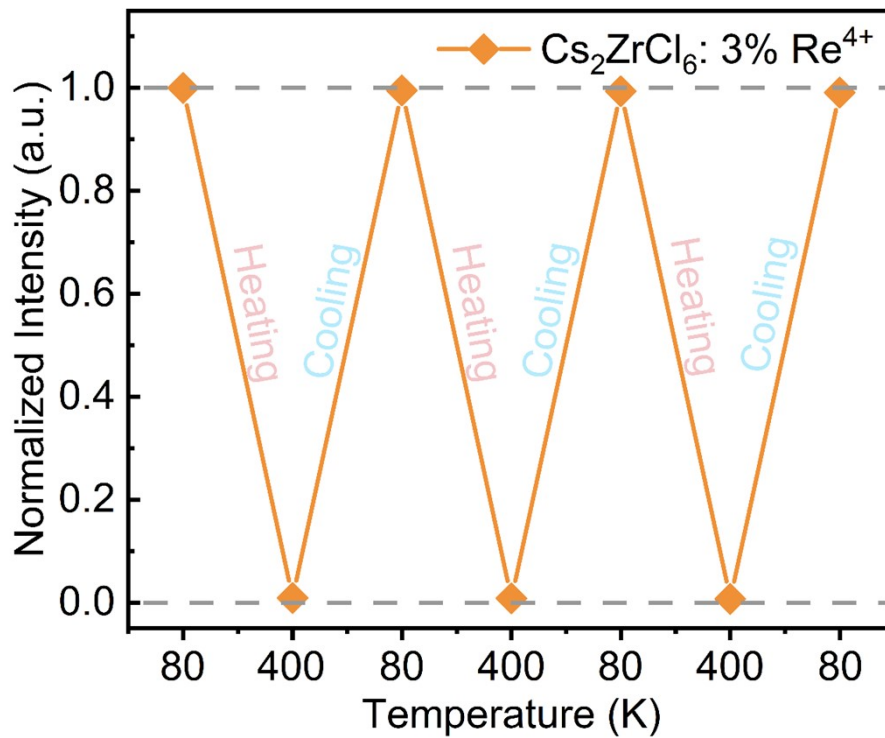

Figure S8. PL intensity variations of  $\text{Cs}_2\text{ZrCl}_6: 3\% \text{Re}^{4+}$  during the heating-cooling cycles.
